# Supplementary material for: pH-controlled crystal growth of copper/gemini surfactant complexes with bipyridine groups
Source: Royal Society of Chemistry journal article supplement (doi:10.1039/c7ce01251a), 2017-01-01
Supplement: c7ce01251a1.pdf [file c7ce01251a1.pdf]

## Electronic Supplementary Information

for

### **pH-Controlled Crystal Growth of Copper/Gemini Surfactant Complexes with Bipyridine Groups**

*Junyao Yao, Qibin Chen\*, Yujie Sheng, Aiting Kai and Honglai Liu*

State Key Laboratory of Chemical Engineering,  
School of Chemistry & Molecular Engineering,  
East China University of Science and Technology,  
Shanghai, 200237, China.

E-mail: [qibinchen@ecust.edu.cn](mailto:qibinchen@ecust.edu.cn)

## Supporting Figures

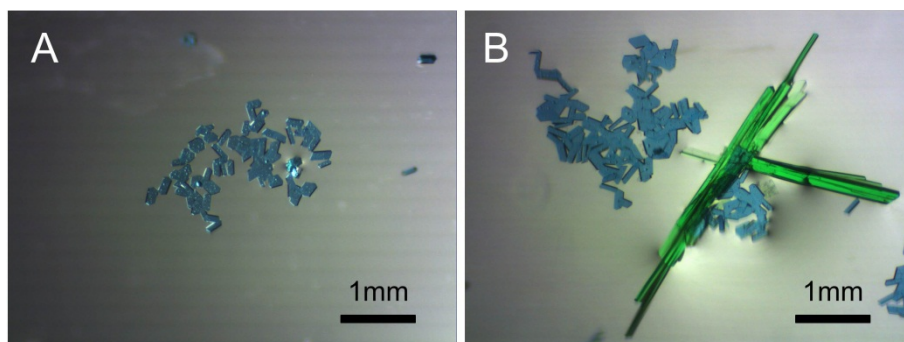

Figure S1. Crystallization from 12Bpy/CuBr<sub>2</sub> mixed solution. (A) The formation of blue crystals at pH = 4.8; (B) The coexistence of blue and green crystals at pH = 4.2.

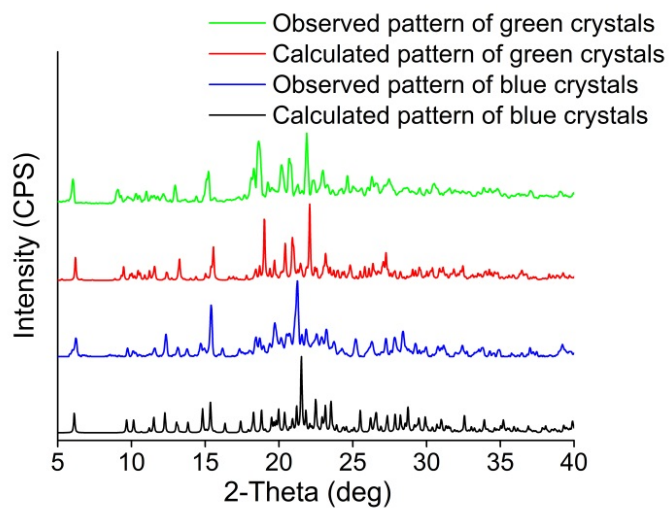

Figure S2. The powder XRD patterns of the blue crystal and green crystal based on both observed measurement and calculated simulation from the single crystalline data.

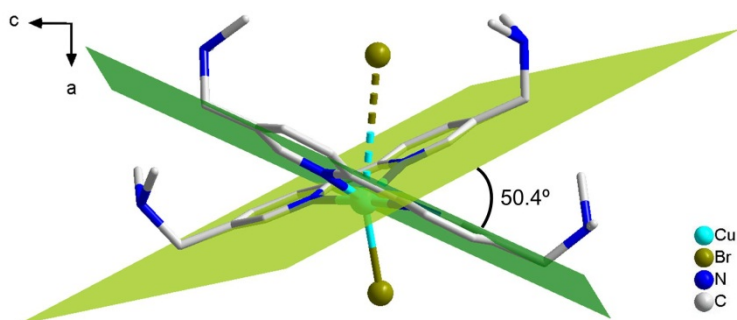

Figure S3. The dihedral angle between two bipyridine planes.

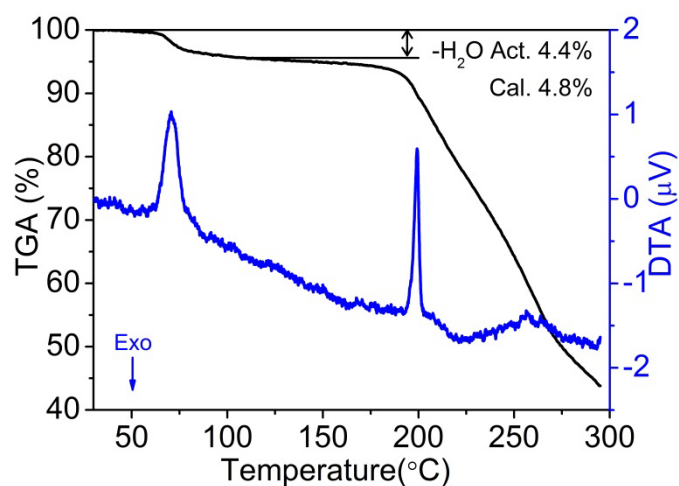

Figure S4. Thermogravimetric analysis together with the differential thermal analysis of green crystals. A 4.4% mass loss before 100 °C in TGA curve is roughly consistent with the crystal water content (4.8%), which can be attributed to the evaporation of water. In addition, the decomposition of complex crystals takes place around 200 °C.

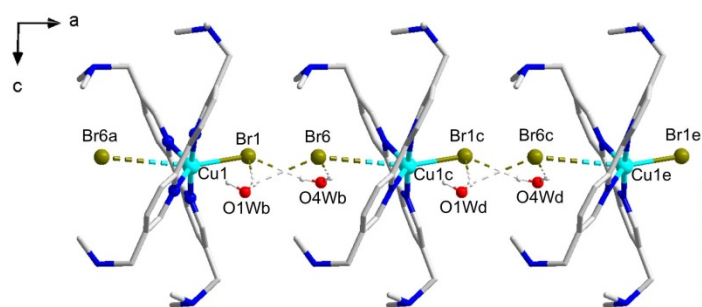

Figure S5. A supramolecular long chain along the a-axis connected with the interactions of O-H...Br hydrogen bonds and Cu-Br coordination. Symmetry codes: (a)  $-1+x, y, z$ ; (b)  $x, y, 1+z$ ; (c)  $1+x, y, z$ ; (d)  $1+x, y, 1+z$ ; (e)  $2+x, y, z$ .

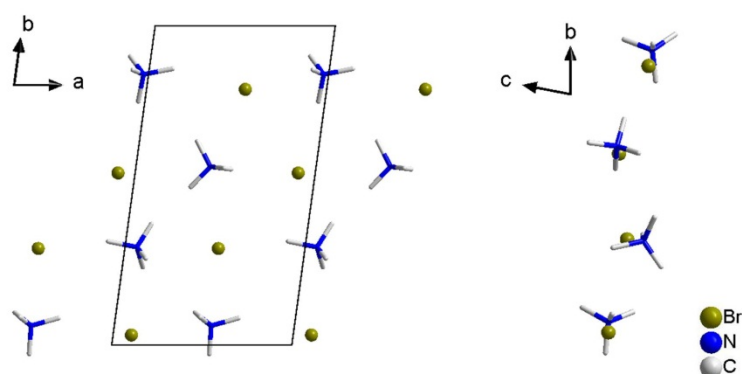

Figure S6. The location of quaternary ammonium head groups and bromide counter ions in the *aob* projection plane.

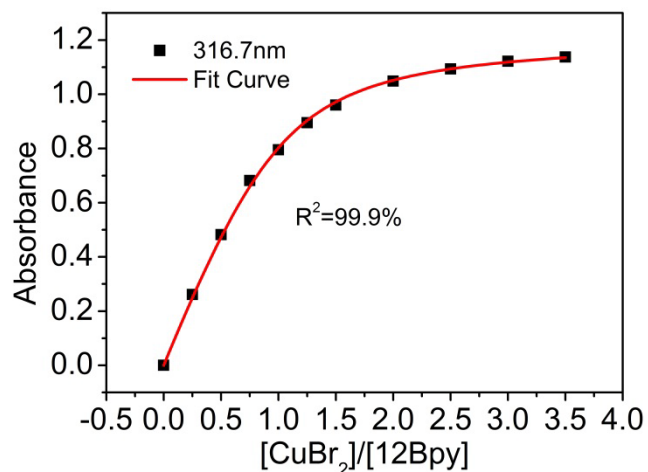

Figure S7. Binding constant estimation by the nonlinear least-squares regression method.

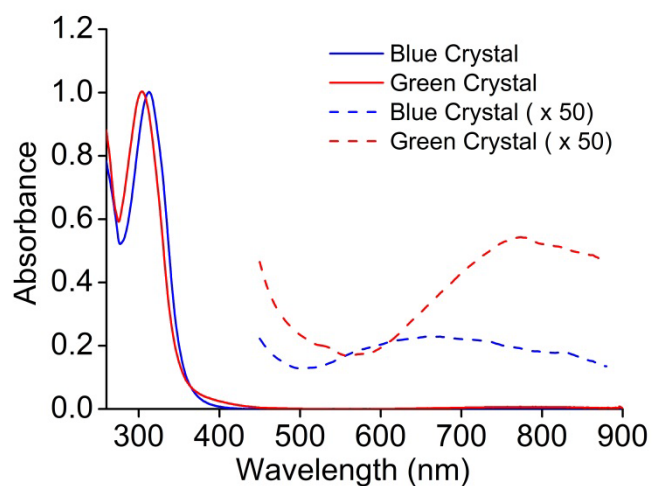

Figure S8. The UV-Vis spectra of blue and green crystals in  $\text{CHCl}_3$  solution.

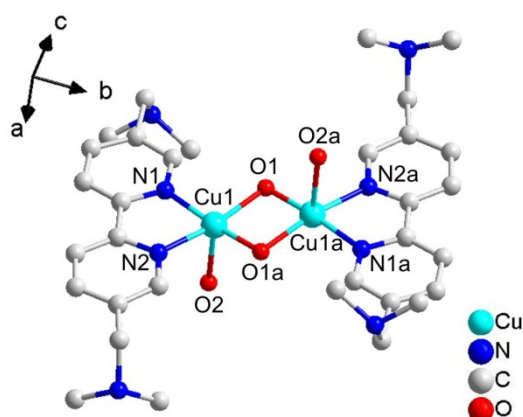

Figure S9. The coordination of Cu(II) ion in the blue crystal showing a square pyramidal geometry with  $\tau = 0.044$ . H atoms and alkyl chains are omitted for clarity. Symmetry codes: (a)  $1-x, -y, 1-z$ .

## Supporting Tables

Table S1. Crystal data and structure refinement

| Crystal reference                 | Blue Crystal                                                                                                           | Green Crystal                                                                                                                      |
|-----------------------------------|------------------------------------------------------------------------------------------------------------------------|------------------------------------------------------------------------------------------------------------------------------------|
| Empirical formula                 | C80 H166 Br6 Cu2 N8 O12                                                                                                | C80 H154 Br6 Cu N8 O5                                                                                                              |
| Formula weight                    | 2038.74                                                                                                                | 1851.11                                                                                                                            |
| Temperature                       | 130 K                                                                                                                  | 143K                                                                                                                               |
| Wavelength                        | 1.54178 Å                                                                                                              | 1.54178 Å                                                                                                                          |
| Crystal system                    | Monoclinic                                                                                                             | triclinic                                                                                                                          |
| Space group                       | P21/c(14)                                                                                                              | P $\bar{1}$ (2)                                                                                                                    |
| Unit cell dimensions              | a=30.2435(5)Å<br>b=9.4252(2)Å<br>c=18.2742(3)Å<br>$\alpha=90^\circ$<br>$\beta=107.5450(10)^\circ$<br>$\gamma=90^\circ$ | a=9.4175(5)Å<br>b=17.1528(9)Å<br>c=28.9801(16)Å<br>$\alpha=79.223(3)^\circ$<br>$\beta=89.723(4)^\circ$<br>$\gamma=82.329(3)^\circ$ |
| Volume                            | 4966.75(16) Å <sup>3</sup>                                                                                             | 4556.6(4) Å <sup>3</sup>                                                                                                           |
| Z                                 | 2                                                                                                                      | 2                                                                                                                                  |
| Density (calculated)              | 1.363 Mg/m <sup>3</sup>                                                                                                | 1.349 Mg/m <sup>3</sup>                                                                                                            |
| Absorption coefficient            | 3.788 mm <sup>-1</sup>                                                                                                 | 3.795 mm <sup>-1</sup>                                                                                                             |
| F(000)                            | 2132                                                                                                                   | 1938                                                                                                                               |
| Crystal size                      | 0.2 x 0.11 x 0.03 mm <sup>3</sup>                                                                                      | 0.26 x 0.15 x 0.06 mm <sup>3</sup>                                                                                                 |
| Theta range for data collection   | 1.532 to 69.592°                                                                                                       | 2.65 to 69.3°                                                                                                                      |
| Index ranges                      | -36<=h<=35, -11<=k<=10,<br>-20<=l<=21                                                                                  | -10<=h<=10, -19<=k<=19,<br>-33<=l<=0                                                                                               |
| Reflections collected             | 26082                                                                                                                  | 14818                                                                                                                              |
| Independent reflections           | 8946[R(int) = 0.0527]                                                                                                  | 14818[R(int) = 0.1011]                                                                                                             |
| Completeness to theta             | 97.6 % (to 67.679°)                                                                                                    | 98.2% (to 64.00°)                                                                                                                  |
| Absorption correction             | Semi-empirical from<br>equivalents                                                                                     | Semi-empirical from<br>equivalents                                                                                                 |
| Max. and min.<br>transmission     | 0.7532 and 0.4104                                                                                                      | 0.4386 and 0.8043                                                                                                                  |
| Refinement method                 | Full-matrix least-squares on<br>F2                                                                                     | Full-matrix least-squares on<br>F2                                                                                                 |
| Data / restraints /<br>parameters | 8946 / 0 / 506                                                                                                         | 14818 / 0 / 913                                                                                                                    |
| Goodness-of-fit on F2             | 1.025                                                                                                                  | 1.113                                                                                                                              |
| Final R indices<br>[I>2sigma(I)]  | R1 = 0.0562, wR2 = 0.1537                                                                                              | R1 = 0.0919, wR2 = 0.2301                                                                                                          |
| R indices (all data)              | R1 = 0.0633, wR2 = 0.1608                                                                                              | R1 = 0.1011, wR2 = 0.2348                                                                                                          |
| Extinction coefficient            | n/a                                                                                                                    | n/a                                                                                                                                |
| Largest diff. peak and<br>hole    | 1.816 and -1.619 e.Å <sup>-3</sup>                                                                                     | 1.156 and -0.974 e.Å <sup>-3</sup>                                                                                                 |
